# Supplementary material for: Identification of a Clinical Cutoff Value for Multiplex KRASG12/G13 Mutation Detection in Colorectal Adenocarcinoma Patients Using Digital Droplet PCR, and Comparison with Sanger Sequencing and PNA Clamping Assay
Source: J Clin Med. 2020 Jul 18;9(7):2283. doi: 10.3390/jcm9072283 (PMC7409004; doi:10.3390/jcm9072283)
Supplement: Supplementary file 1 [file jcm-09-02283-s001.pdf]

**Supplementary Table S1.** Diagnostic value of KRA<sup>G12/13</sup> mutation detection by ddPCR, Sanger sequencing, and PNA-clamping assay, and NGS panel sequencing (IonS5, Thermo Fisher Scientific).

|             | Detection of KRA <sup>G12/13</sup> Mutation |                   |                    |                      |
|-------------|---------------------------------------------|-------------------|--------------------|----------------------|
|             | ddPCR                                       | Sanger sequencing | PNA-clamping assay | NGS panel sequencing |
| Sensitivity | 96.43%                                      | 100%              | 89.29%             | 39.29%               |
| Specificity | 98.11%                                      | 92.45%            | 84.91%             | 88.68%               |
| PPV         | 96.43%                                      | 87.50%            | 75.76%             | 64.71%               |
| NPV         | 98.11%                                      | 100%              | 93.75%             | 73.44%               |

PPV, positive predictive value; NPV, negative predictive value. \* For comparative analysis, cases in which KRAS<sup>G12/G13</sup> mutation was detected by three or more methods were defined as positive references.
